# Supplementary material
Source: ML conference proceedings conference paper supplement (https://openreview.net/forum?id=8rcFOqEud5)
Supplement: supplementary_material [file attachment]

## Sheet: Sheet7
completion	acc	std	Method	completion_per_question(k)
0.252	0.28	0.04	ORM+Best-of-N	1260
0.404	0.305	0.025	ORM+Best-of-N	2020
0.832	0.31	0.025	ORM+Best-of-N	4160
1.66	0.32	0.015	ORM+Best-of-N	8300
3.3	0.335	0.015	ORM+Best-of-N	16500
8.33	0.345	0.01	ORM+Best-of-N	41650
0.79	0.35	0.03	ReST-MCTS* (Iter #1)	3950
1.58	0.365	0.02	ReST-MCTS* (Iter #1)	7900
3.16	0.415	0.02	ReST-MCTS* (Iter #1)	15800
4.74	0.425	0.015	ReST-MCTS* (Iter #1)	23700
6.32	0.435	0.015	ReST-MCTS* (Iter #1)	31600
7.9	0.44	0.015	ReST-MCTS* (Iter #1)	39500
0.252	0.31	0.03	Self-Consistency	1260
0.417	0.35	0.02	Self-Consistency	2085
0.833	0.375	0.015	Self-Consistency	4165
1.66	0.405	0.015	Self-Consistency	8300
3.34	0.42	0.015	Self-Consistency	16700
8.32	0.425	0.01	Self-Consistency	41600
0.566	0.285	0.025	PRM+Best-of-N	2830
0.847	0.3	0.025	PRM+Best-of-N	4235
1.45	0.32	0.02	PRM+Best-of-N	7250
2.82	0.335	0.025	PRM+Best-of-N	14100
5.72	0.345	0.02	PRM+Best-of-N	28600
8.5	0.35	0.015	PRM+Best-of-N	42500
0.78	0.375	0.03	ReST-MCTS* (Iter #2)	3900
1.56	0.395	0.03	ReST-MCTS* (Iter #2)	7800
3.12	0.43	0.035	ReST-MCTS* (Iter #2)	15600
4.69	0.47	0.025	ReST-MCTS* (Iter #2)	23450
6.25	0.475	0.02	ReST-MCTS* (Iter #2)	31250
7.81	0.48	0.02	ReST-MCTS* (Iter #2)	39050
0.252	0.24	0.04	ORM+Best-of-N	1260
0.404	0.28	0.025	ORM+Best-of-N	2020
0.832	0.285	0.025	ORM+Best-of-N	4160
1.66	0.305	0.015	ORM+Best-of-N	8300
3.3	0.32	0.015	ORM+Best-of-N	16500
8.33	0.335	0.01	ORM+Best-of-N	41650
0.79	0.32	0.03	ReST-MCTS* (Iter #1)	3950
1.58	0.345	0.02	ReST-MCTS* (Iter #1)	7900
3.16	0.395	0.02	ReST-MCTS* (Iter #1)	15800
4.74	0.41	0.015	ReST-MCTS* (Iter #1)	23700
6.32	0.42	0.015	ReST-MCTS* (Iter #1)	31600
7.9	0.425	0.015	ReST-MCTS* (Iter #1)	39500
0.252	0.28	0.03	Self-Consistency	1260
0.417	0.33	0.02	Self-Consistency	2085
0.833	0.36	0.015	Self-Consistency	4165
1.66	0.39	0.015	Self-Consistency	8300
3.34	0.405	0.015	Self-Consistency	16700
8.32	0.415	0.01	Self-Consistency	41600
0.566	0.26	0.025	PRM+Best-of-N	2830
0.847	0.275	0.025	PRM+Best-of-N	4235
1.45	0.3	0.02	PRM+Best-of-N	7250
2.82	0.31	0.025	PRM+Best-of-N	14100
5.72	0.325	0.02	PRM+Best-of-N	28600
8.5	0.335	0.015	PRM+Best-of-N	42500
0.78	0.345	0.03	ReST-MCTS* (Iter #2)	3900
1.56	0.365	0.03	ReST-MCTS* (Iter #2)	7800
3.12	0.395	0.035	ReST-MCTS* (Iter #2)	15600
4.69	0.445	0.025	ReST-MCTS* (Iter #2)	23450
6.25	0.455	0.02	ReST-MCTS* (Iter #2)	31250
7.81	0.46	0.02	ReST-MCTS* (Iter #2)	39050
0.252	0.32	0.04	ORM+Best-of-N	1260
0.404	0.33	0.025	ORM+Best-of-N	2020
0.832	0.335	0.025	ORM+Best-of-N	4160
1.66	0.335	0.015	ORM+Best-of-N	8300
3.3	0.35	0.015	ORM+Best-of-N	16500
8.33	0.355	0.01	ORM+Best-of-N	41650
0.79	0.38	0.03	ReST-MCTS* (Iter #1)	3950
1.58	0.385	0.02	ReST-MCTS* (Iter #1)	7900
3.16	0.435	0.02	ReST-MCTS* (Iter #1)	15800
4.74	0.44	0.015	ReST-MCTS* (Iter #1)	23700
6.32	0.45	0.015	ReST-MCTS* (Iter #1)	31600
7.9	0.455	0.015	ReST-MCTS* (Iter #1)	39500
0.252	0.34	0.03	Self-Consistency	1260
0.417	0.37	0.02	Self-Consistency	2085
0.833	0.39	0.015	Self-Consistency	4165
1.66	0.42	0.015	Self-Consistency	8300
3.34	0.435	0.015	Self-Consistency	16700
8.32	0.435	0.01	Self-Consistency	41600
0.566	0.31	0.025	PRM+Best-of-N	2830
0.847	0.325	0.025	PRM+Best-of-N	4235
1.45	0.34	0.02	PRM+Best-of-N	7250
2.82	0.36	0.025	PRM+Best-of-N	14100
5.72	0.365	0.02	PRM+Best-of-N	28600
8.5	0.365	0.015	PRM+Best-of-N	42500
0.78	0.405	0.03	ReST-MCTS* (Iter #2)	3900
1.56	0.425	0.03	ReST-MCTS* (Iter #2)	7800
3.12	0.465	0.035	ReST-MCTS* (Iter #2)	15600
4.69	0.495	0.025	ReST-MCTS* (Iter #2)	23450
6.25	0.495	0.02	ReST-MCTS* (Iter #2)	31250
7.81	0.5	0.02	ReST-MCTS* (Iter #2)	39050
